# Supplementary material for: A Quasi-Domesticate Relic Hybrid Population of Saccharomyces cerevisiae × S. paradoxus Adapted to Olive Brine
Source: PubMed Central journal article supplement (PMC6548830; doi:10.3389/fgene.2019.00449), 2019-05-29
Supplement: Data_Sheet_1.pdf [file Data_Sheet_1.pdf]

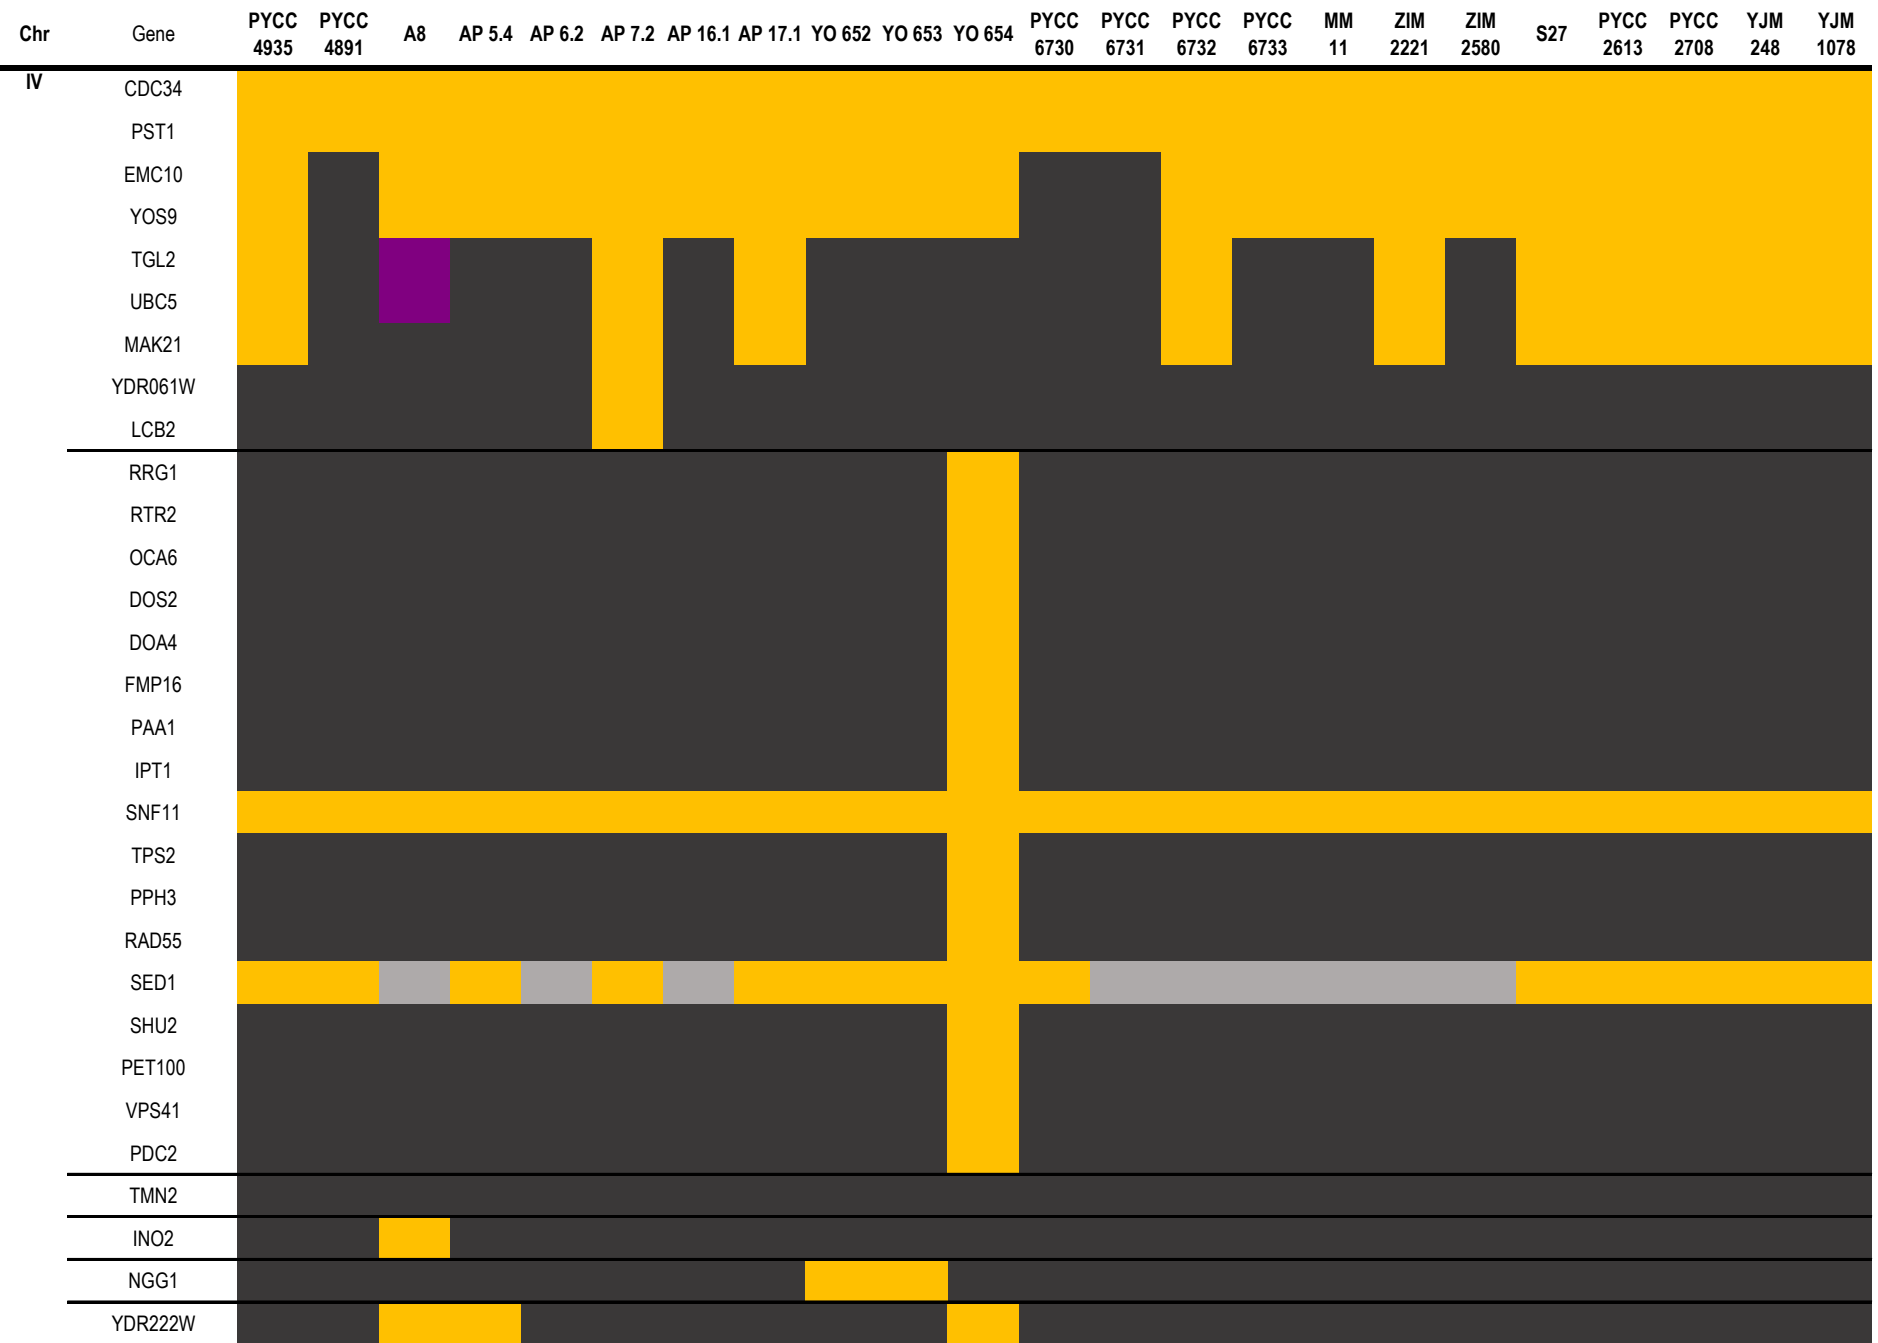





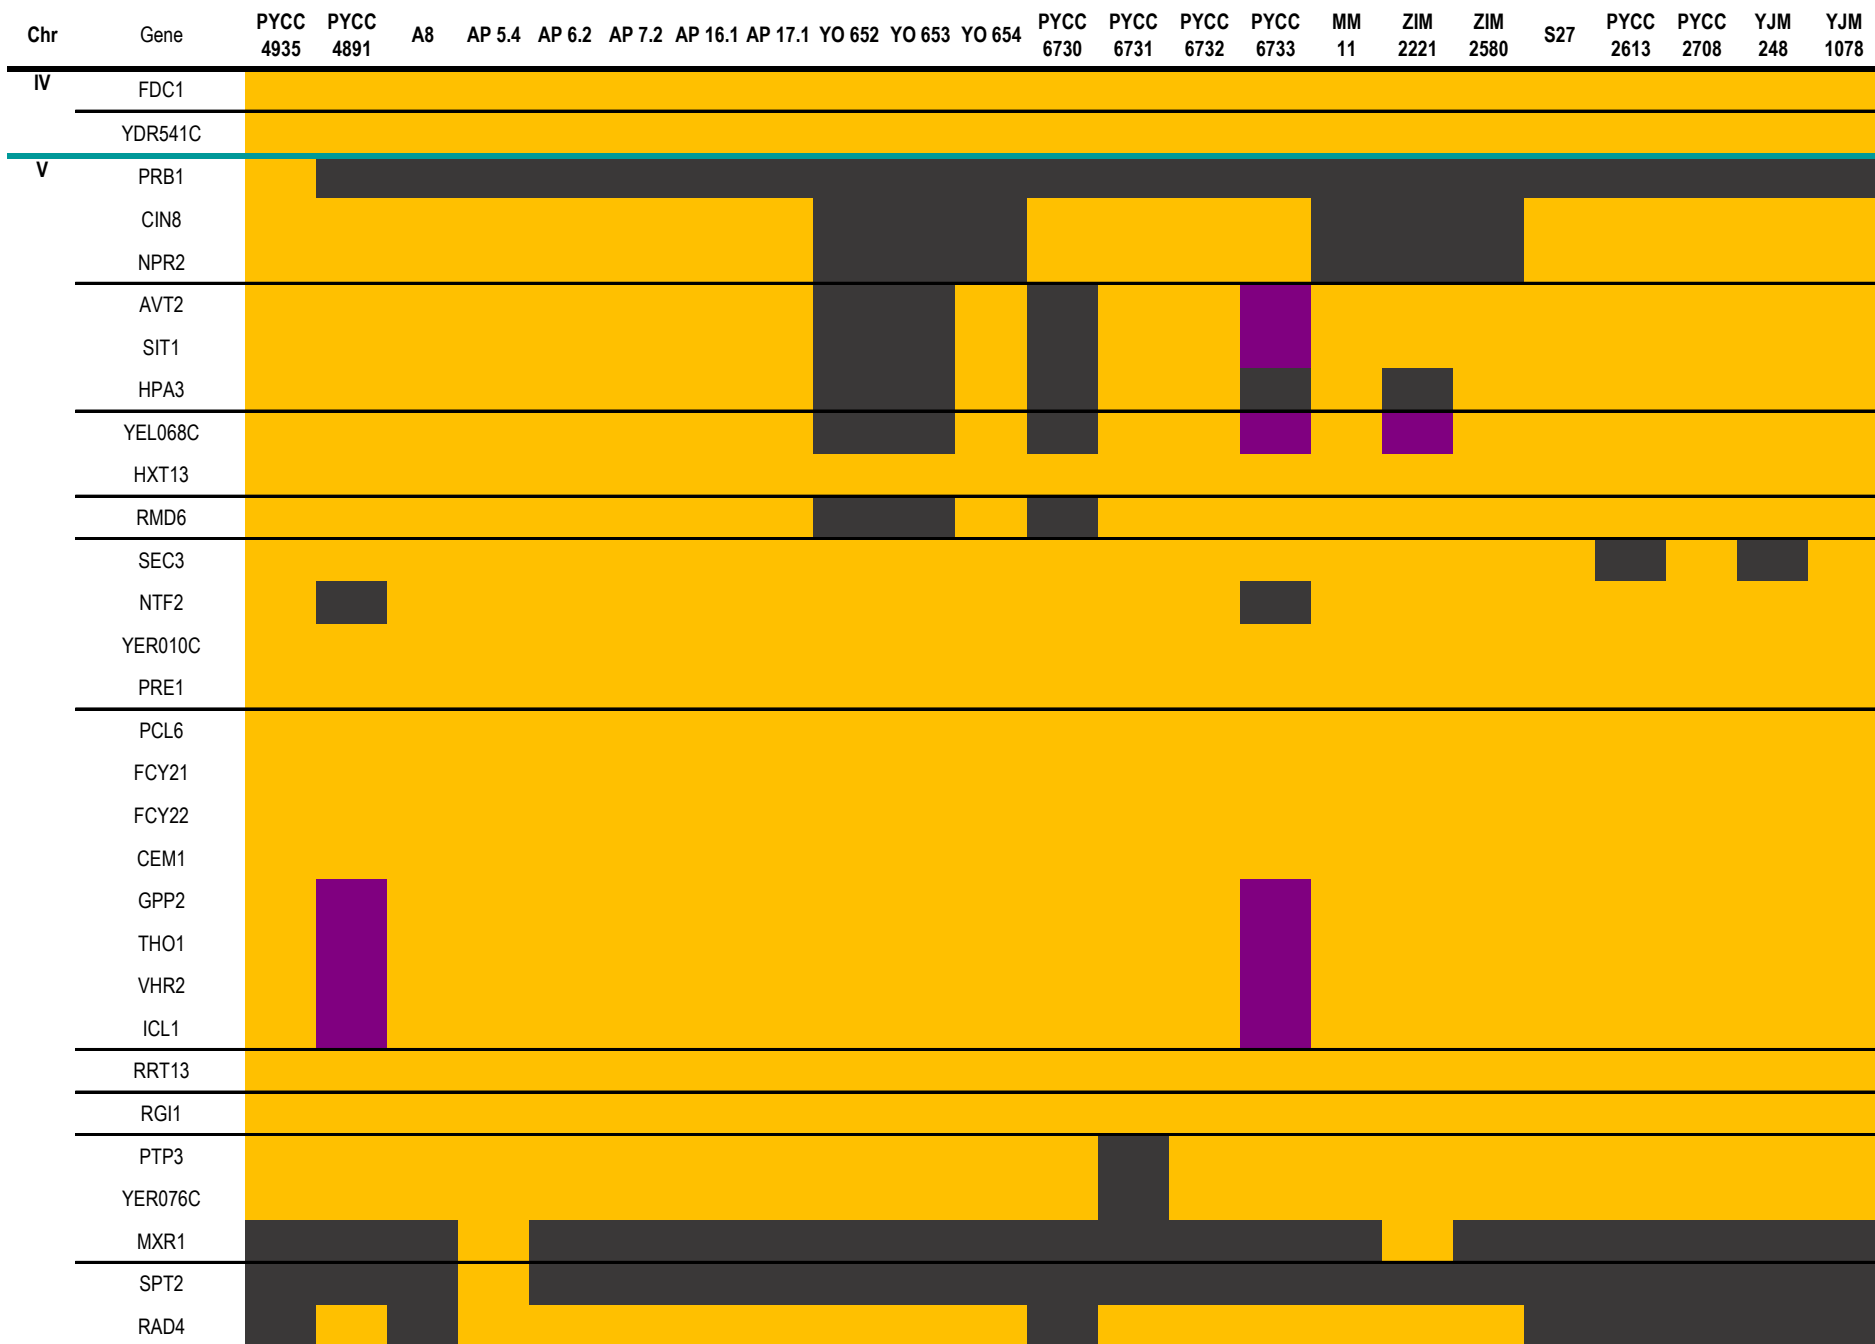









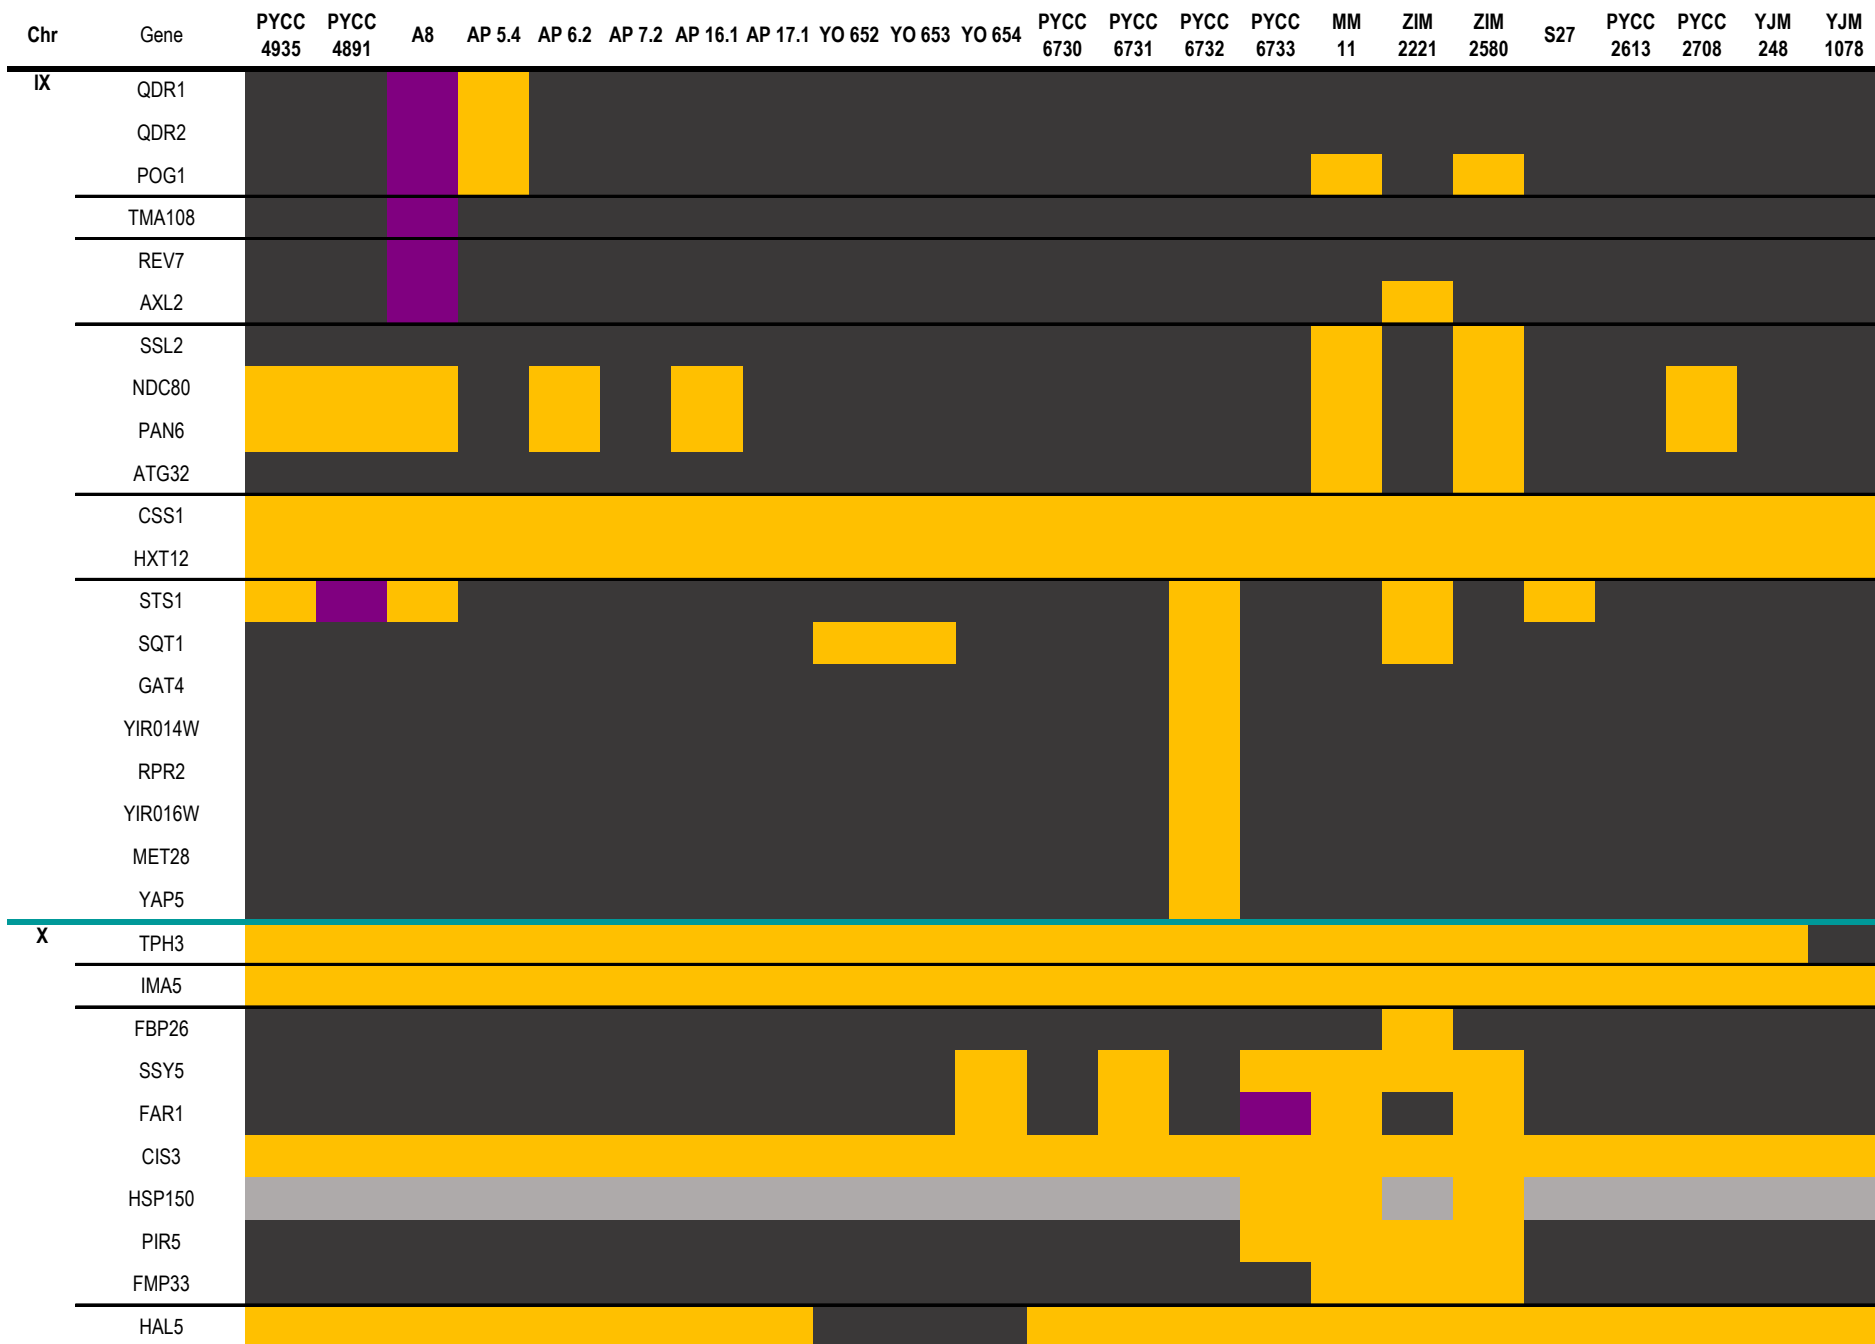



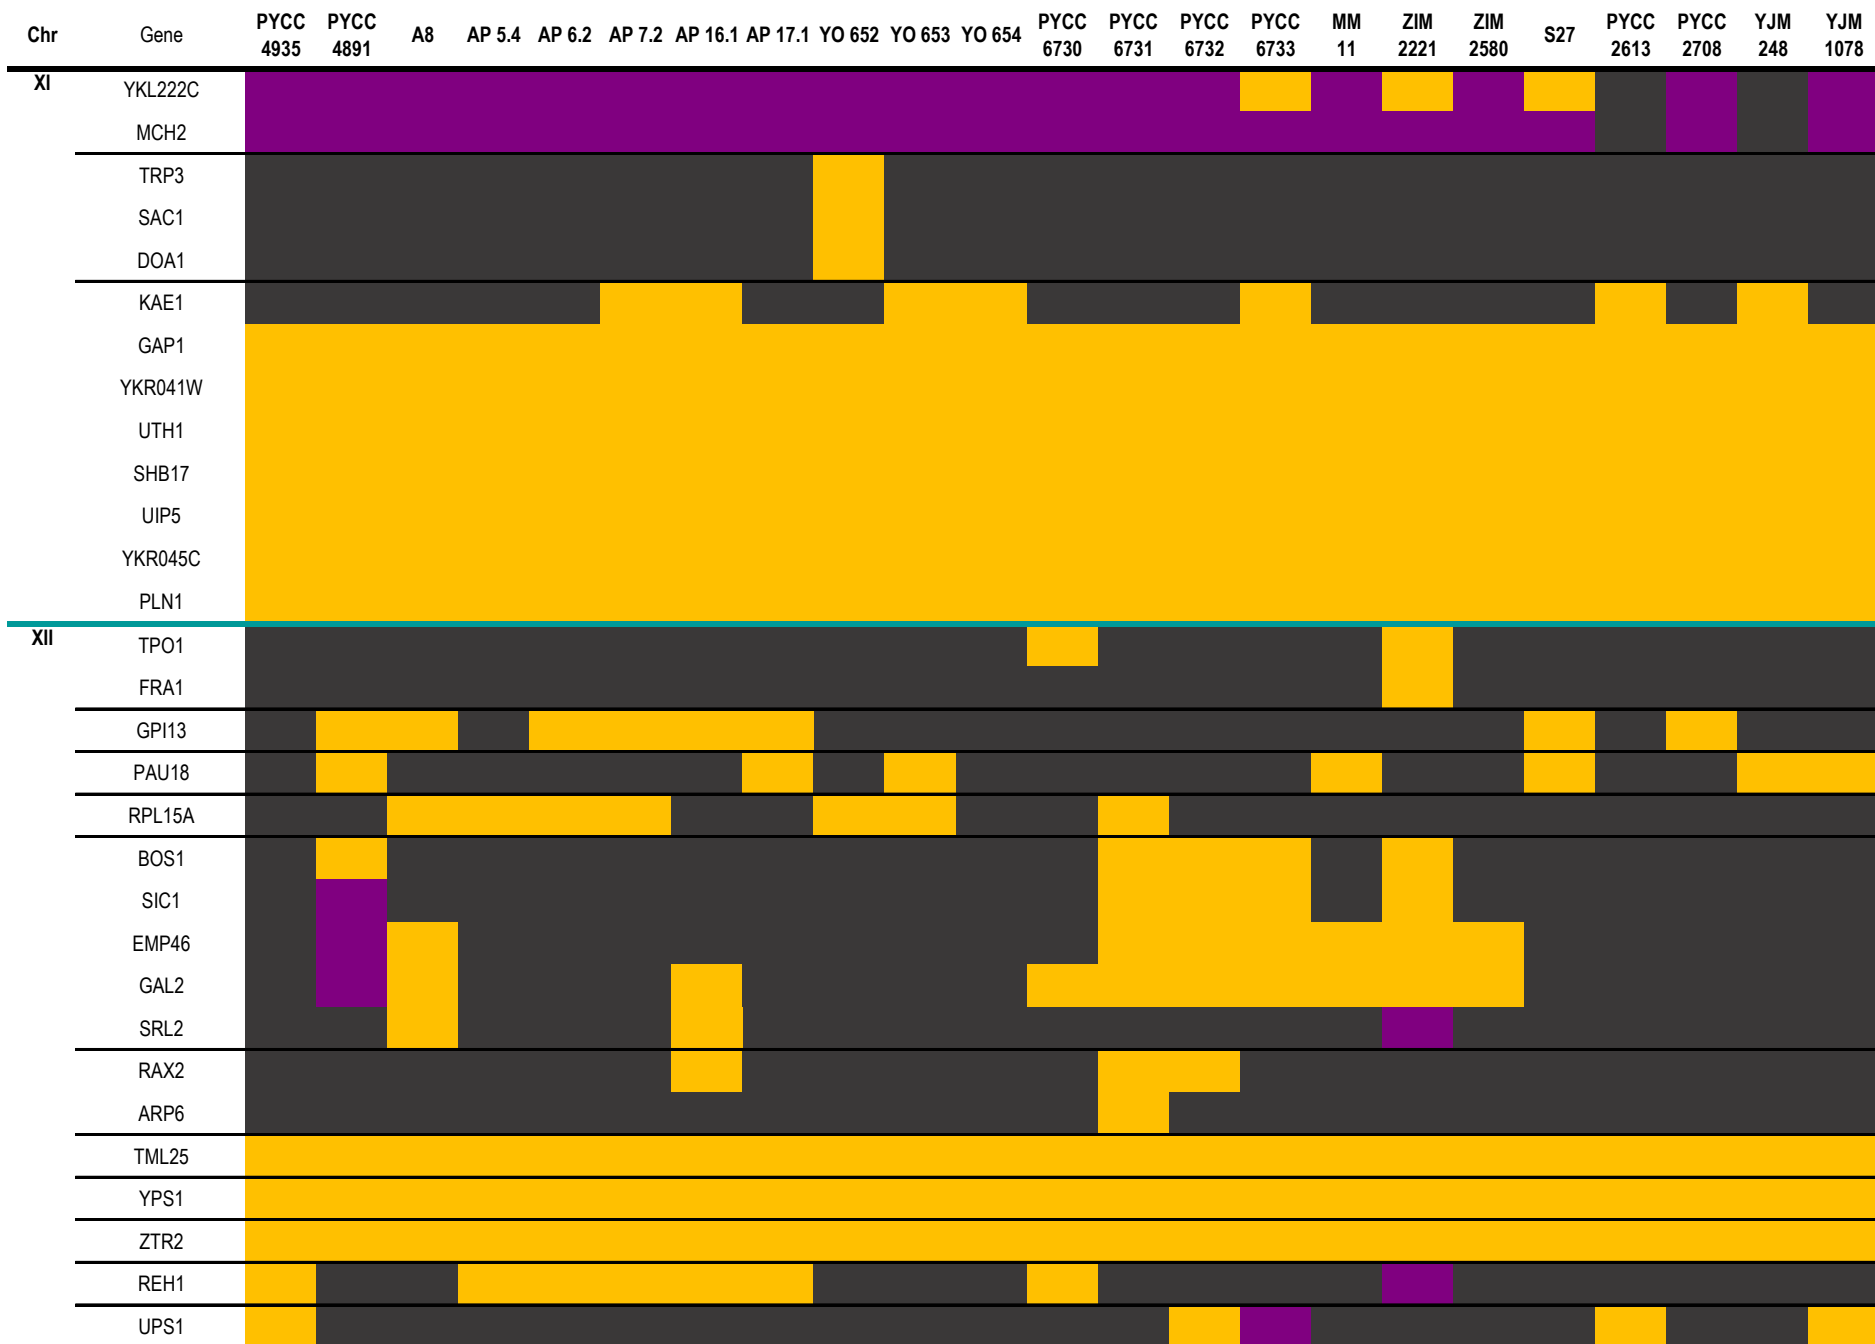



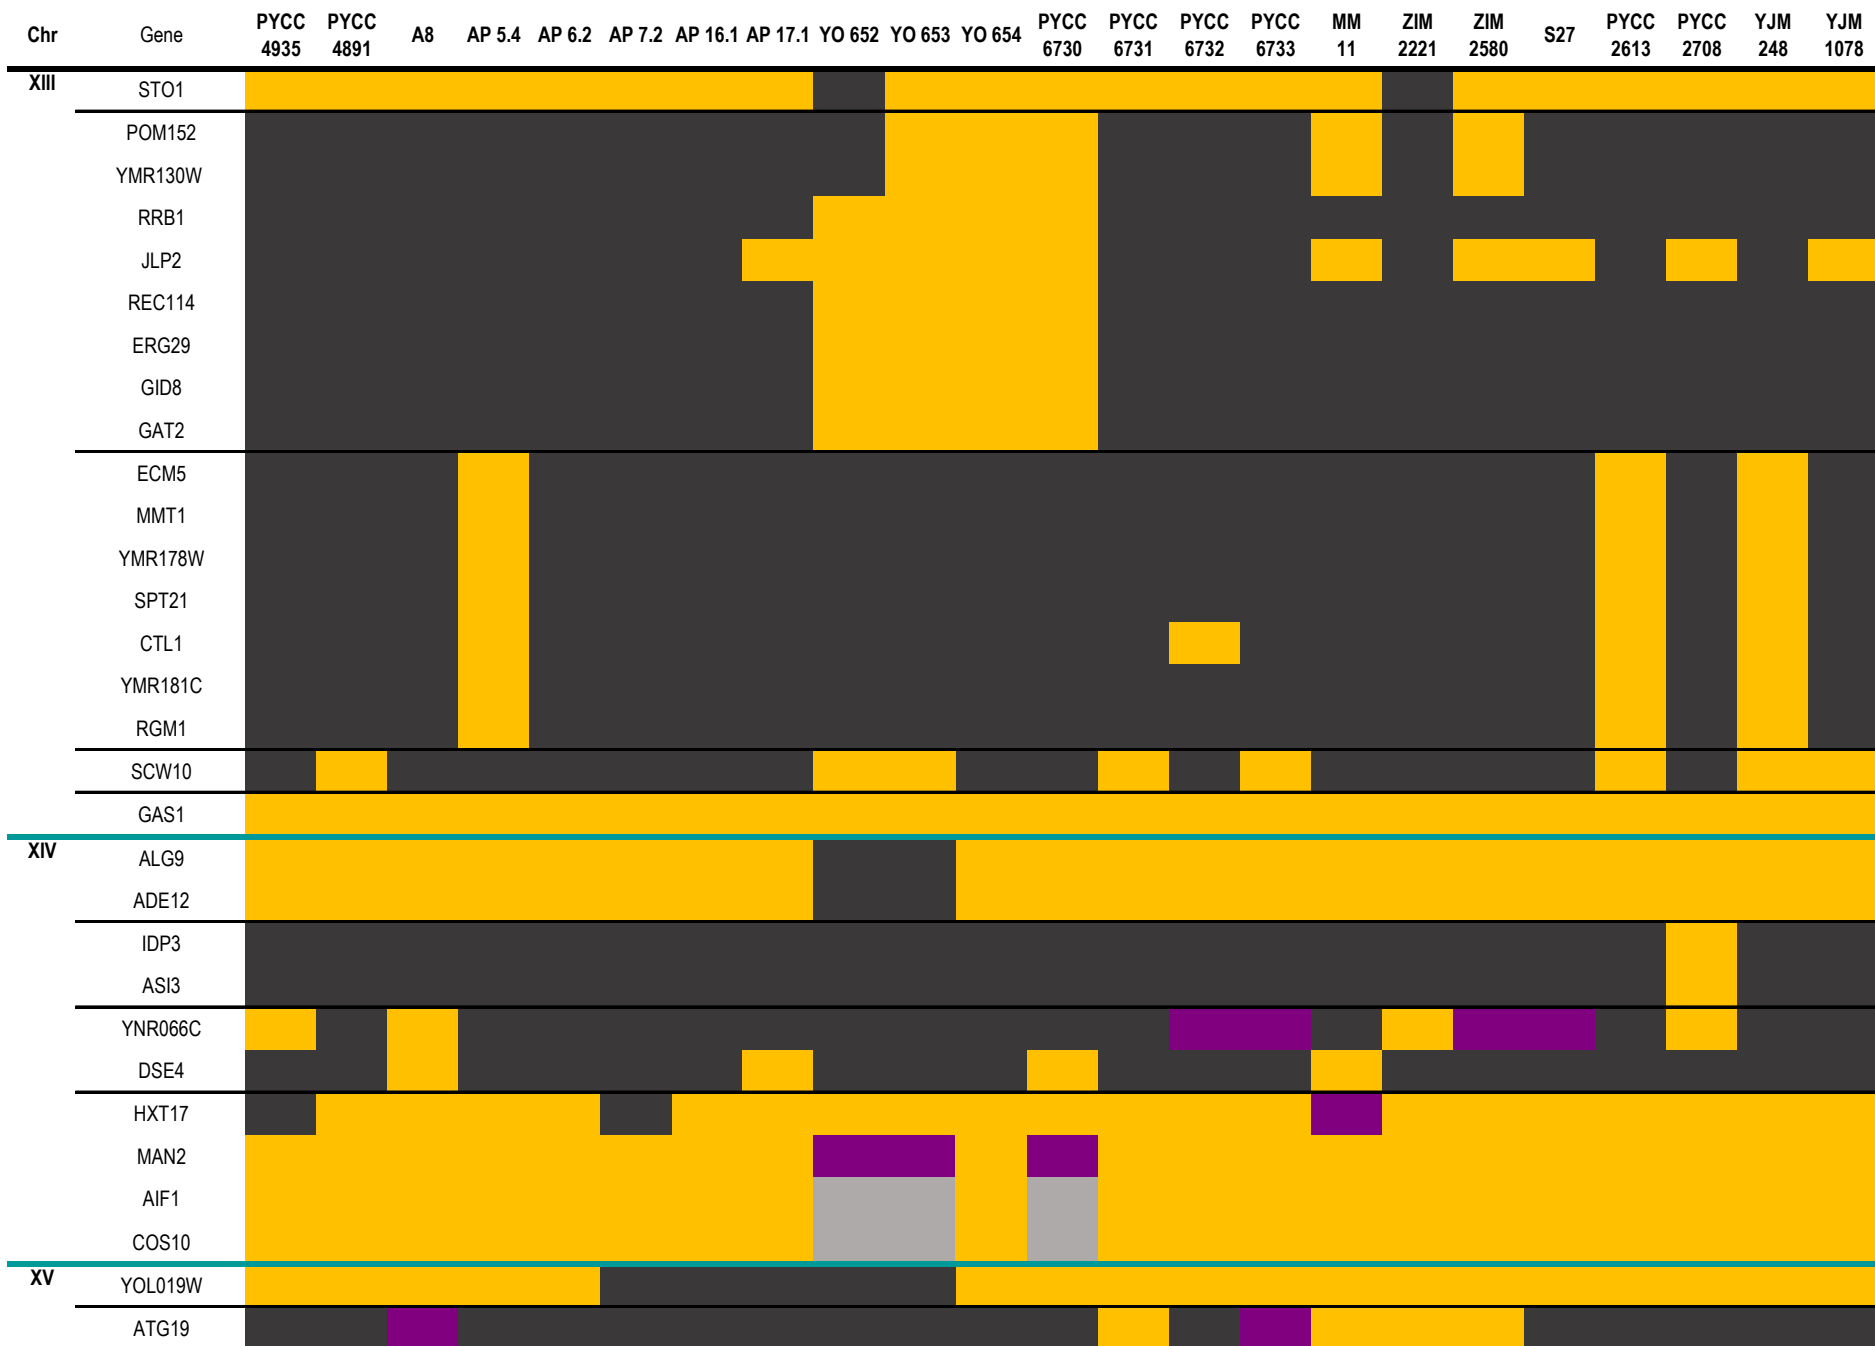







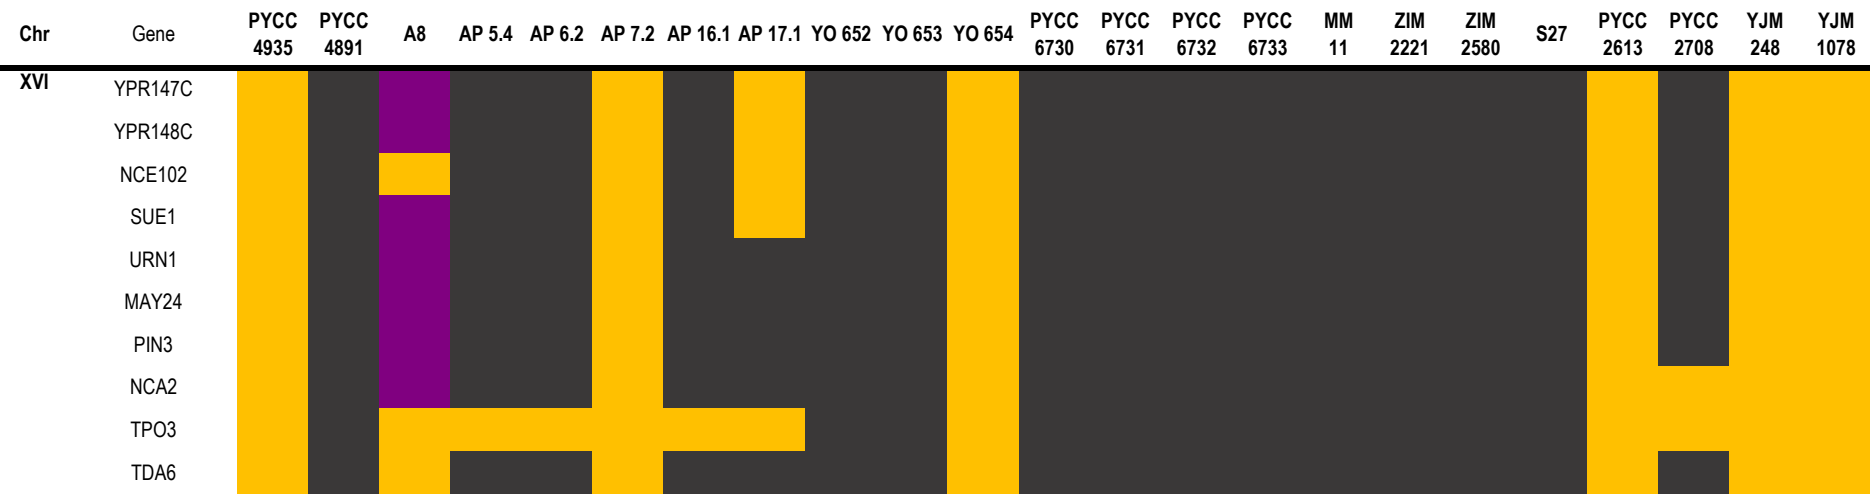

*S. paradoxus* genes      250    254    314    288    246    237    249    275    193    216    282    227    241    271    259    269    269    270    236    268    250    259    244

Shared *S. paradoxus* genes      103

- Blue horizontal line separate chromosomes
- Black horizontal line separate gene blocks
