# Supplementary material for: A Quasi-Domesticate Relic Hybrid Population of Saccharomyces cerevisiae × S. paradoxus Adapted to Olive Brine
Source: PubMed Central journal article supplement (PMC6548830; doi:10.3389/fgene.2019.00449), 2019-05-29
Supplement: Image_1.pdf [file Image_1.pdf]

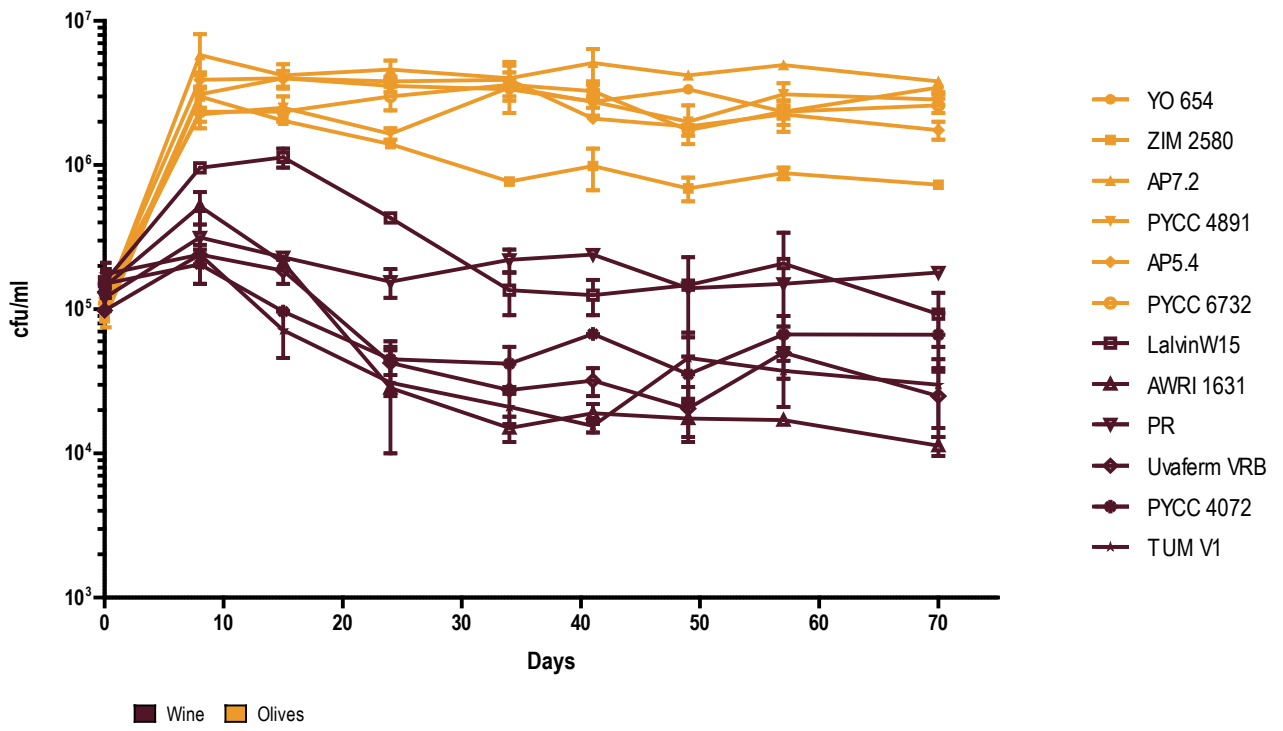

**SUPPLEMENTARY FIGURE S1.** Two replicate assays of growth and survival in olive brine of representatives of the Olives and Wine populations of *S. cerevisiae*.
