# Supplementary material for: A Quasi-Domesticate Relic Hybrid Population of Saccharomyces cerevisiae × S. paradoxus Adapted to Olive Brine
Source: PubMed Central journal article supplement (PMC6548830; doi:10.3389/fgene.2019.00449), 2019-05-29
Supplement: Image_2.pdf [file Image_2.pdf]

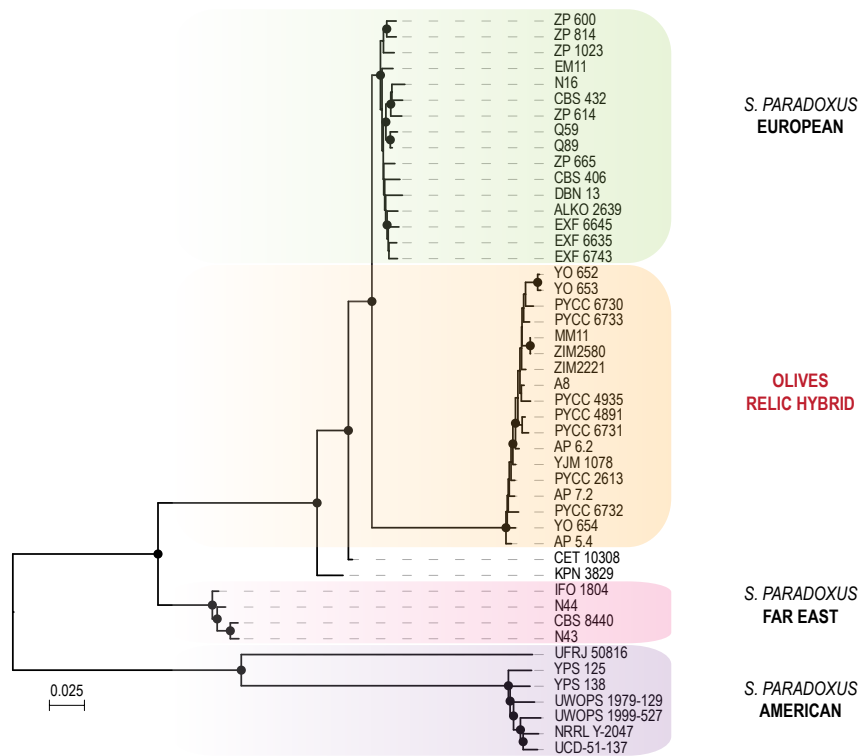

**SUPPLEMENTARY FIGURE S2.** Phylogenetic tree constructed with *S. paradoxus* fraction of the hybrid genomes and correspondent regions from the representatives of the European, American and Far Eastern population of *S. paradoxus*.
