# Supplementary material for: A Quasi-Domesticate Relic Hybrid Population of Saccharomyces cerevisiae × S. paradoxus Adapted to Olive Brine
Source: PubMed Central journal article supplement (PMC6548830; doi:10.3389/fgene.2019.00449), 2019-05-29
Supplement: Table_1.pdf [file Table_1.pdf]

SUPPLEMENTARY TABLE S1. Strains and genomes used in this study and relevant information pertaining to them.

| STRAIN         | OTHER DESIGNATIONS                 | SUBSTRATE                                                 | ORIGIN                                | WGS GROUP | HETEROZIGOUS SITES (Q > 40) | SPORULATION | REGIONS |       |       | AQY1  | AQY2 | CNV  |        |        | GENOME DATA | REFERENCE             |                                   |
|----------------|------------------------------------|-----------------------------------------------------------|---------------------------------------|-----------|-----------------------------|-------------|---------|-------|-------|-------|------|------|--------|--------|-------------|-----------------------|-----------------------------------|
|                |                                    |                                                           |                                       |           |                             |             | A       | B     | C     |       |      | ACT1 | CUP1-1 | CUP1-2 |             |                       |                                   |
| AWRI 1631      | N 96                               | Wine                                                      | Australia                             | WINE      | n.d.                        | n.d.        |         |       | 8/19  | NF    | NF   | n.d. | n.d.   | n.d.   | PRJNA30553  | Borneman et al. 2008  |                                   |
| AWRI 796       | Active Dry Wine Yeast              | Commercial wine yeast                                     | South Africa                          | WINE      | 1041 *                      | n.d.        |         | DUP   | F     | NF    | NF   | n.d. | n.d.   | n.d.   | PRJNA48559  | Borneman et al. 2011  |                                   |
| EXF 6719       |                                    | Wine must                                                 | Cuber, Slovenia                       | WINE      | 2053                        | +           |         |       | 17/19 | NF    | NF   | 2    | 1      | 1      | PRJEB7601   | Almeida et al. 2015   |                                   |
| ZP 641         |                                    | Spontaneous red wine fermentation                         | Castelo de Vide, Portugal             | WINE      | 1484                        | +           |         |       |       | NF    | NF   | 2    | 4      | 3      | PRJEB7601   | Almeida et al. 2015   |                                   |
| L1374          |                                    | Wine (must from Pal's variety)                            | Cauquenes, Chile                      | WINE      | 1550                        | n.d.        |         |       | 5/5   | NF    | NF   | 2    | 2      | 1      | SGRP2       | Bergström et al. 2014 |                                   |
| L1528          |                                    | Wine (must from Cabernet variety)                         | Cauquenes, Chile                      | WINE      | 1334                        | n.d.        |         |       | 5/5   | NF    | NF   | 2    | 16     | 17     | SGRP2       | Bergström et al. 2014 |                                   |
| Lalvin BM45    | AWRI 1486                          | Commercial yeast (white wine)                             |                                       | WINE      | 1280                        | +           |         |       | 5/5   | 2/19  | NF   | NF   | 2      | 2      | 2           | PRJEB19382            | Almeida et al. 2017               |
| Lalvin CY-3079 | AWRI 2078                          | Commercial yeast (red wine)                               |                                       | WINE      | 1974                        | +           |         |       | 5/5   | 4/19  | NF   | NF   | 2      | 3      | 2           | PRJEB19382            | Almeida et al. 2017               |
| Lalvin W15     |                                    | Commercial yeast (white and red wine)                     |                                       | WINE      | 2209                        | +           |         |       | 5/5   |       | F    | NF   | 2      | 10     | 14          | PRJEB19382            | Almeida et al. 2017               |
| PR             |                                    | Pasteur Red                                               |                                       | WINE      | 1715                        | +           |         |       |       |       | NF   | NF   | 2      | 2      | 2           | PRJEB19382            | Almeida et al. 2017               |
| PYCC 4072      |                                    | Commercial wine yeast (Fermivin)                          | Portugal                              | WINE      | 1889                        | +           |         |       |       |       | NF   | NF   | 2      | 2      | 3           | PRJEB19382            | Almeida et al. 2017               |
| TUM V1         |                                    | Bordeaux wine                                             |                                       | WINE      | 1827                        | +           |         |       |       |       | NF   | NF   | 2      | 1      | 1           | PRJEB19382            | Almeida et al. 2017               |
| Uvaferm SGV    |                                    | Commercial yeast (red wine)                               |                                       | WINE      | 1734                        | +           |         |       | 4/19  | NF    | NF   | 2    | 1      | 2      | PRJEB19382  | Almeida et al. 2017   |                                   |
| Uvaferm VRB    |                                    | Commercial yeast ( red wine)                              |                                       | WINE      | 2750                        | +           |         |       | 19/19 | NF    | NF   | 2    | 5      | 5      | PRJEB19382  | Almeida et al. 2017   |                                   |
| Vin 13         | AWRI 1537                          | Commercial wine yeast                                     |                                       | WINE      | 15216 *                     | n.d.        |         | DUP   | 2/19  | F     | NF   | n.d. | n.d.   | n.d.   | PRJNA48563  | Borneman et al. 2011  |                                   |
| VL3            | B 6, AWRI 1688                     | Commercial wine yeast                                     |                                       | WINE      | 9904 *                      | n.d.        |         |       | 5/5   | 8/19  | NF   | NF   | n.d.   | n.d.   | n.d.        | PRJNA48565            | Borneman et al. 2011              |
| WE 372         |                                    | Commercial wine yeast                                     | Cape Town, South Africa               | WINE      | 4354                        | n.d.        |         |       | 5/5   |       | F    | NF   | 2      | 8      | 10          | PRJNA60199            | Justin Fay, Washington University |
| YJM 1332       |                                    | Wine                                                      | Italy                                 | WINE      | 1660                        | n.d.        |         |       | 2/19  | NF    | NF   | 3    | 2      | 2      | PRJNA189896 | Strope et al. 2015    |                                   |
| YJM 1336       |                                    | Wine                                                      | Italy                                 | WINE      | 1547                        | n.d.        |         |       |       |       | NF   | NF   | n.d.   | n.d.   | n.d.        | PRJNA189897           | Strope et al. 2015                |
| YJM 1341       | NRRL Y-12637                       | Grape must                                                | South Africa                          | WINE      | 2350                        | n.d.        |         |       |       |       | NF   | NF   | 2      | 4      | 4           | PRJNA189899           | Strope et al. 2015                |
| YJM 1415       | NRRL Y-268                         | Wine                                                      | France                                | WINE      | 1256                        | n.d.        |         |       | 5/5   | 19/19 | NF   | NF   | 2      | 1      | 1           | PRJNA189914           | Strope et al. 2015                |
| SBK            |                                    | Bark of olive tree (variety Leccino) close to the soil    | Kolomban, Slovenia                    | WINE      | 919                         | +           |         |       | 5/5   | 5/19  | NF   | NF   | 2      | 17     | 15          | PRJEB30431            | This study                        |
| YO 392         |                                    | Table olive                                               | Purchased in Tecate, Mexico           | WINE      | 1859                        | +           |         |       |       |       | NF   | NF   | 2      | 3      | 3           | PRJEB30431            | This study                        |
| SS8            |                                    | Extra virgin olive oil with macerated perforate St John's | Bozava, Dugi otok, Croatia            | WINE      | 2565                        | -           |         |       | 5/5   | 5/19  | NF   | NF   | 2      | 19     | 11          | PRJEB30431            | This study                        |
| S21            |                                    | Bark of olive tree variety, sampled close to the soil     | Kolomban, Slovenia                    | WINE      | 3101                        | n.d.        |         |       |       |       | NF   | NF   | 2      | 7      | 5           | PRJEB30431            | This study                        |
| EC 1118        | Prise de Mousse                    | Industrial strain isolated from Champagne                 | France                                | WINE      | n.d.                        | n.d.        |         | 15/15 | 5/5   | 19/19 | NF   | NF   | 2      | 2      | 2           | PRJEA37863            | Novo et al. 2009                  |
| IOC 18-2007    | AWRI 2340                          | Commercial yeast                                          |                                       | WINE      | 2181                        | +           |         |       | 5/5   |       | NF   | F    | 2      | 6      | 5           | PRJEB19382            | Almeida et al. 2017               |
| IOC 9002       |                                    | Commercial wine yeast                                     |                                       | WINE      | 1224                        | -           |         |       | 5/5   | 4/19  | NF   | NF   | 2      | 11     | 6           | PRJNA264372           | Almeida et al. 2015               |
| Lalvin QA23    |                                    | Commercial wine yeast                                     | Portugal                              | WINE      | 18861 *                     | n.d.        |         | 15/15 | TRIP  | 19/19 | NF   | F    | 2      | 2      | 2           | PRJNA48561            | Borneman et al. 2011              |
| YJM 1574       | AWRI 1775                          | Wine                                                      |                                       | WINE      | 1796                        | n.d.        |         |       | 5/5   |       | NF   | NF   | 3      | 7      | 7           | PRJNA189934           | Strope et al. 2015                |
| YJM 270        | CBS 2807                           | Wine                                                      | Slovenia                              | WINE      | 1662                        | n.d.        |         |       | 19/19 | NF    | F    | 2    | 1      | 1      | PRJNA189852 | Strope et al. 2015    |                                   |
| PYCC 4074      |                                    | Commercial wine yeast (Fermichamp)                        | Portugal                              | WINE      | 2263                        | +           |         | 15/15 | 5/5   |       | NF   | F    | 2      | 6      | 5           | PRJEB19382            | Almeida et al. 2017               |
| PYCC 6722      | CBS 5155                           | Wine                                                      | South Armenia                         | WINE      | 2121                        | +           |         |       |       |       | NF   | F    | 2      | 1      | 1           | PRJEB19382            | Almeida et al. 2017               |
| PYCC 6726      |                                    | Jerez-wine                                                | Spain                                 | WINE      | 4939                        | +           |         |       |       |       | NF   | F    | 2      | 1      | 1           | PRJEB19382            | Almeida et al. 2017               |
| PYCC 6729      |                                    | Jerez-wine                                                | Armenia                               | WINE      | 2901                        | +           |         |       |       |       | NF   | F    | 2      | 1      | 1           | PRJEB19382            | Almeida et al. 2017               |
| YO 652         | Kalamata 1                         | Table olives (variety Kalamata)                           | Purchased in Seattle, Washington, USA | OLIVES    | 2851                        | +           |         |       |       |       | NF   | NF   | 2      | 6      | 6           | PRJEB30431            | This study                        |
| YO 653         | Kalamata 2                         | Table olives (variety Kalamata)                           | Purchased in Seattle, Washington, USA | OLIVES    | 3342                        | +           |         |       |       |       | NF   | NF   | 2      | 4      | 4           | PRJEB30431            | This study                        |
| YO 654         | Kalamata 3                         | Table olive brine (variety Kalamata)                      | Purchased in Seattle, Washington, USA | OLIVES    | 3466                        | +           |         |       |       |       | NF   | NF   | 2      | 8      | 7           | PRJEB30431            | This study                        |
| PYCC 4935      |                                    | Table olive brine                                         | Portalegre, Portugal                  | OLIVES    | 1713                        | +           |         |       |       |       | NF   | NF   | 2      | 1      | 1           | PRJEB30431            | This study                        |
| PYCC 4891      |                                    | Table olive brine                                         | Elvas, Portugal                       | OLIVES    | 10653                       | -           |         |       |       |       | NF   | NF   | 2      | 2      | 2           | PRJEB30431            | This study                        |
| PYCC 6730      |                                    | Table olives                                              | Spain                                 | OLIVES    | 2965                        | +           |         |       | 5/5   |       | NF   | NF   | 2      | 2      | 1           | PRJEB30431            | This study                        |
| PYCC 6731      |                                    | Alpechin                                                  | Spain                                 | OLIVES    | 1393                        | +           |         |       | 4/5   |       | NF   | NF   | 2      | 1      | 1           | PRJEB30431            | This study                        |
| PYCC 6732      | NRRL Y-6679; CBS 3081; YJM 1252    | Alpechin                                                  | Spain                                 | OLIVES    | 1886                        | -           |         |       |       |       | NF   | NF   | 2      | 1      | 1           | PRJEB30431            | This study                        |
| PYCC 6733      |                                    | Alpechin                                                  | Spain                                 | OLIVES    | 5258                        | -           |         |       |       |       | NF   | NF   | 2      | 1      | 1           | PRJEB30431            | This study                        |
| CBS 7002       | PYCC 8023                          | Alpechin                                                  | Sevilla, Spain                        | OLIVES    | 2471                        | +           |         |       |       |       | NF   | NF   | 2      | 4      | 3           | PRJEB30431            | This study                        |
| A8             |                                    | Table olive brine                                         | Purchased in Oeiras, Portugal         | OLIVES    | 16637                       | -           |         |       |       |       | NF   | NF   | 2      | 3      | 2           | PRJEB30431            | This study                        |
| AP 5.4         |                                    | Table olive brine                                         | Purchased in Lisbon, Portugal         | OLIVES    | 2914                        | +           |         |       |       |       | NF   | NF   | 2      | 7      | 8           | PRJEB30431            | This study                        |
| AP 6.2         |                                    | Table olive brine                                         | Purchased in Lisbon, Portugal         | OLIVES    | 2031                        | +           |         |       |       |       | NF   | NF   | 1      | 12     | 10          | PRJEB30431            | This study                        |
| AP 7.2         |                                    | Table olive brine                                         | Purchased in Lisbon, Portugal         | OLIVES    | 3116                        | +           |         |       |       |       | NF   | NF   | 2      | 4      | 3           | PRJEB30431            | This study                        |
| AP 16.1        |                                    | Table olive brine                                         | Douro, Portugal                       | OLIVES    | 2618                        | +           |         |       |       |       | NF   | NF   | 2      | 20     | 15          | PRJEB30431            | This study                        |
| AP 17.1        |                                    | Table olive brine                                         | Douro, Portugal                       | OLIVES    | 2961                        | +           |         |       |       |       | NF   | NF   | 2      | 3      | 3           | PRJEB30431            | This study                        |
| MM 11          |                                    | Sediment of olive oil                                     | Kolomban, Slovenia                    | OLIVES    | 3153                        | -           |         |       |       |       | NF   | NF   | 2      | 1      | 1           | PRJEB30431            | This study                        |
| ZIM 2221       |                                    | Olive oil (variety Oblica)                                | Split, Croatia                        | OLIVES    | 14951                       | -           |         |       | 5/5   |       | NF   | NF   | 2      | 8      | 10          | PRJEB30431            | This study                        |
| ZIM 2580       |                                    | Sediment of olive oil                                     | Kolomban, Slovenia                    | OLIVES    | 3117                        | +           |         |       |       |       | NF   | NF   | 2      | 1      | 1           | PRJEB30431            | This study                        |
| S27            |                                    | Ripe olive (variety Belica)                               | Kolomban, Slovenia                    | OLIVES    | 3217                        | -           |         |       |       |       | NF   | NF   | 2      | 3      | 2           | PRJEB30431            | This study                        |
| PYCC 2708      |                                    | Swine rectum                                              | Portugal                              | OLIVES    | 3559                        | +           |         |       |       |       | NF   | NF   | 2      | 7      | 8           | PRJEB30431            | This study                        |
| PYCC 2613      | CBS 2909; NRRL YB-6041             | Human feces                                               | Portugal                              | OLIVES    | 6783                        | +           |         |       |       |       | NF   | NF   | 2      | 2      | 4           | PRJEB30431            | This study                        |
| NRRL-Y 12658   | CBS 4411; PYCC 8033                | Pig rectal contents                                       | unknown                               | OLIVES    | 2850                        | +           |         |       |       |       | NF   | NF   | 2      | 17     | 16          | PRJEB30431            | This study                        |
| YJM 248        | NRRL Y-12659; CBS 2910; PYCC 8034  | Human feces                                               | Portugal                              | OLIVES    | 6185                        | n.d.        |         |       |       |       | NF   | NF   | 2      | 5      | 5           | SRR800854             | Strope et al. 2015                |
| YJM 1078       | NRRL YB-4348; PYCC 2625; PYCC 8028 | Human feces                                               | Portugal                              | OLIVES    | 2752                        | n.d.        |         |       |       |       | NF   | NF   | 3      | 6      | 5           | SRR800768             | Strope et al. 2015                |
| PYR 4b         | DBQ 26                             | <i>Quercus pubescens</i>                                  | Halkidiki, Greece                     | MO        | 2738                        | n.d.        |         |       |       |       | F    | F    | 2      | 1      | 1           | PRJEB7601             | Almeida et al. 2015               |
| EXF 7200       |                                    | <i>Quercus robur</i>                                      | Jasenovo Polje, Montenegro            | MO        | 3001                        | n.d.        |         |       |       |       | F    | F    | 2      | 1      | 1           | PRJNA264372           | Almeida et al. 2015               |

|                |                   |                                                 |                                 |                  |       |      |  |     |       |    |    |      |      |      |             |                                   |
|----------------|-------------------|-------------------------------------------------|---------------------------------|------------------|-------|------|--|-----|-------|----|----|------|------|------|-------------|-----------------------------------|
| HUN 9.1s1      | DBS 14            | Oak                                             | Hungary                         | MO               | 2745  | n.d. |  |     |       | F  | F  | 2    | 1    | 1    | PRJEB7601   | Almeida et al. 2015               |
| ZP 541         |                   | <i>Fagus sylvatica</i>                          | Adagoi, Portugal                | MO               | 2684  | +    |  |     |       | F  | F  | 2    | 1    | 1    | PRJEB7601   | Almeida et al. 2015               |
| ZP 570         |                   | <i>Fraxinus</i> sp.                             | Paul Boquilobo, Portugal        | MO               | 2813  | +    |  |     |       | F  | F  | 2    | 1    | 1    | PRJEB7601   | Almeida et al. 2015               |
| ZP 848         |                   | <i>Quercus ilex</i>                             | Alter do Chão, Portugal         | MO               | 2656  | n.d. |  |     |       | F  | F  | 3    | 1    | 1    | PRJEB7675   | Almeida et al. 2015               |
| PYCC 4226      |                   | Commercial baker's yeast                        |                                 | BREAD            | 30081 | -    |  | 4/5 | 2/19  | NF | NF | 2    | 1    | 2    | ERS1108635  | Gonçalves et al. 2016             |
| Platinum       |                   | Commercial baker's yeast                        |                                 | BREAD            | 42278 | -    |  | 4/5 | 15/19 | NF | NF | 2    | 1    | 1    | ERS1108633  | Gonçalves et al. 2016             |
| AP 13.1        |                   | Baker's yeast                                   | Portugal                        | BREAD            | 53091 | -    |  | 5/5 | 17/19 | NF | NF | 2    | 2    | 2    | PRJEB24932  | Barbosa et al. 2018               |
| TUM 381        |                   | Belgian beer                                    | Belgium                         | BEER 1 - WHEAT   | 30358 | -    |  |     |       | NF | F  |      |      |      | ERS1108612  | Gonçalves et al. 2016             |
| TUM 508        |                   | Irish ale / stout                               | Ireland                         | BEER 1 - BRITISH | 44826 | -    |  |     |       | NF | NF |      |      |      | ERS1108630  | Gonçalves et al. 2016             |
| TUM 208        |                   | Alt beer                                        | Rhineland-Palatinate, Germany   | BEER 1 - GERMAN  | 33689 | -    |  |     |       | NF | NF |      |      |      | ERS1108617  | Gonçalves et al. 2016             |
| CBS 1598       |                   | Sake moto                                       | Nakazawa, Japan                 | SAKE             | 3517  | -    |  |     |       | NF | NF | 2    | 3    | 1    | ERS1108639  | Gonçalves et al. 2016             |
| UC5            | UCD612            | Sene sake                                       | Kurashi, Japan                  | SAKE             | n.d.  | n.d. |  |     |       | NF | NF |      |      |      | PRJNA60197  | Justin Fay, Washington University |
| Kyokai7        |                   | Sake yeast                                      | Japan                           | SAKE             | n.d.  | n.d. |  |     |       | NF | NF |      |      |      | PRJNA45827  | Akao et al. 2011                  |
| A38            |                   | Olive collected from olive tree                 | Alqueva, Portugal               | SAKE             | 2747  | -    |  |     |       | NF | NF | 1    | 4    | 4    | PRJEB30431  | This study                        |
| TUM 127        | progeny of TUM 68 | Wheat beer                                      | Freising-Weihenstephan, Germany | SAKE             | 5979  | -    |  |     |       | NF | NF |      |      |      | ERS1108644  | Gonçalves et al. 2016             |
| NRRL-YB-4084   |                   | Coconut sap                                     | Philippines                     | PHILIPPINES      | 10363 | -    |  |     |       | NF | F  |      |      |      | ERS1108646  | Gonçalves et al. 2016             |
| YJM 1400       | NRRL YB-4081      | Guava (fruit)                                   | Philippines                     | PHILIPPINES      | 2960  | n.d. |  |     |       | NF | NF |      |      |      | PRJNA189911 | Strope et al. 2015                |
| ZP 779         |                   | <i>Quercus acutissima</i>                       | Okayama prefecture, Japan       | NA & JP          | 3509  | +    |  |     |       | F  | F  |      |      |      | PRJEB7601   | Almeida et al. 2015               |
| ZP 781         |                   | <i>Quercus serrata</i>                          | Okayama prefecture, Japan       | NA & JP          | 3333  | +    |  |     |       | F  | F  |      |      |      | PRJEB7601   | Almeida et al. 2015               |
| YPS 128        |                   | <i>Quercus alba</i>                             | Pennsylvania, USA               | NA & JP          | 3118  | n.d. |  |     |       | F  | F  |      |      |      | SGRP2       | Bergström et al. 2014             |
| YPS 163        |                   | <i>Quercus rubra</i>                            | Pennsylvania, USA               | NA & JP          | 2673  | n.d. |  |     |       | F  | F  |      |      |      | PRJNA28813  | Doniger et al. 2008               |
| ZP 651         |                   | <i>Quercus acutissima</i>                       | Chiba prefecture, Japan         | NA & JP          | 3623  | +    |  |     |       | F  | F  |      |      |      | PRJEB7601   | Almeida et al. 2015               |
| ZP 656         |                   | <i>Quercus acuta</i>                            | Chiba prefecture, Japan         | NA & JP          | 3723  | +    |  |     |       | F  | F  |      |      |      | PRJEB7601   | Almeida et al. 2015               |
| PW5            |                   | Raphia palm wine                                | Aba, Abia state, Nigeria        | WEST AFRICA      | 1175  | n.d. |  |     |       | NF | F  |      |      |      | PRJNA60181  | Justin Fay, Washington University |
| YJM 1248       | NRRL Y-1546       | Billi wine from <i>Osbeckia grandiflora</i>     | West Africa                     | WEST AFRICA      | 2600  | n.d. |  |     |       | NF | F  |      |      |      | PRJNA189888 | Strope et al. 2015                |
| YJM 1439       | NCYC 110          | Ginger beer from <i>Z. officinale</i>           | West Africa                     | WEST AFRICA      | 2129  | n.d. |  |     |       | NF | F  |      |      |      | PRJNA189920 | Strope et al. 2015                |
| UWOPS 03-461-4 |                   | Nectar of Bertram palm                          | Malaysia                        | MALAYSIA         | 18636 | n.d. |  |     |       | NF | NF |      |      |      | SGRP2       | Bergström et al. 2014             |
| UWOPS 03-433-3 |                   | Nectar of Bertram palm                          | Malaysia                        | MALAYSIA         | 1908  | +    |  |     |       | -- | -- |      |      |      | ERS1108647  | Gonçalves et al. 2016             |
| YJM 1447       | UWOPS 05-227.2    | Bertram palm                                    | Malaysia                        | MALAYSIA         | n.d.  | n.d. |  |     |       | NF | NF | n.d. | n.d. | n.d. | PRJNA189923 | Strope et al. 2015                |
| A44            |                   | Olive collected from olive tree                 | Alqueva, Portugal               | MOSAIC           | 3768  | +    |  |     |       | NF | NF | 2    | 9    | 6    | PRJEB30431  | This study                        |
| A5             |                   | Olive collected from olive tree (variety Gaeta) | Mação, Portugal                 | MOSAIC           | 4551  | +    |  |     |       | F  | NF | 2    | 2    | 1    | PRJEB30431  | This study                        |

\* values taken from the literature (see reference)

MO, Mediterranean oaks  
NA & JP, North America and Japan

F Functional  
NF Non Functional

#### References:

- Akao et al. 2011. Whole-genome sequencing of sake yeast *Saccharomyces cerevisiae* Kyokai no. 7. DNA Res. 18, 423-434.
- Almeida et al. 2015. A population genomic insight into the Mediterranean origins of wine yeast domestication. Mol. Eco. 24, 5412-5427.
- Almeida et al. 2017. Adaptive divergence in wine yeasts and their wild relatives suggests a prominent role for introgressions and rapid evolution at noncoding sites. Mol. Ecol. 26, 2167-2182.
- Barbosa et al. 2018. Multiple rounds of artificial selection promote microbe secondary domestication – the case of cachaça yeasts. GBE 10, 1939-1955.
- Bergström et al. 2014. A high-definition view of functional genetic variation from natural yeast genomes. Mol Biol Evol 31, 872–888.
- Borneman et al. 2008. Comparative genome analysis of a *Saccharomyces cerevisiae* wine strain. FEMS Yeast Res. 8, 1185-1195.
- Borneman et al. 2011. Whole-genome comparison reveals novel genetic elements that characterize the genome of industrial strains of *Saccharomyces cerevisiae*. PLoS Genet. 7, E1001287.
- Doniger et al. 2008. A catalog of neutral and deleterious polymorphism in yeast. PLoS Genet 4, e1000183.
- Gonçalves et al. 2016. Distinct domestication trajectories in top-fermenting beer yeasts and wine yeasts. Curr Biol 26, 2750-2761.
- Novo et al. 2009. Eukaryote-to-eukaryote gene transfer events revealed by the genome sequence of the wine yeast *Saccharomyces cerevisiae* EC1118. PNAS 106, 16333-16338.
- Strope et al. 2015. The 100-genomes strains, an *S. cerevisiae* resource that illuminates its natural phenotypic and genotypic variation and emergence as an opportunistic pathogen. Genome Res. 25, 762-774.
