# Supplementary material for: A Quasi-Domesticate Relic Hybrid Population of Saccharomyces cerevisiae × S. paradoxus Adapted to Olive Brine
Source: PubMed Central journal article supplement (PMC6548830; doi:10.3389/fgene.2019.00449), 2019-05-29
Supplement: Table_2.pdf [file Table_2.pdf]

SUPPLEMENTARY TABLE S2. Gene Ontology (GO) analysis of the *S. paradoxus* sub-genome of relic hybrid strains.

| GO TERM   | GENE ONTOLOGY TERM (P-VALUE < 0.01)               | OLIVE BRINE |           |    |        |        |        |         |         |        |        |        |           | ALPECHIN / OLIVE OIL |           |           |       | OLIVE TREE |          |     |           | INTESTINAL TRACT |         |          |  | SHARED |  |  |  |  |
|-----------|---------------------------------------------------|-------------|-----------|----|--------|--------|--------|---------|---------|--------|--------|--------|-----------|----------------------|-----------|-----------|-------|------------|----------|-----|-----------|------------------|---------|----------|--|--------|--|--|--|--|
|           |                                                   | PYCC 4935   | PYCC 4891 | A8 | AP 5.4 | AP 6.2 | AP 7.2 | AP 16.1 | AP 17.1 | YO 652 | YO 653 | YO 654 | PYCC 6730 | PYCC 6731            | PYCC 6732 | PYCC 6733 | MM 11 | ZIM 2221   | ZIM 2580 | S27 | PYCC 2613 | PYCC 2708        | YJM 248 | YJM 1078 |  |        |  |  |  |  |
| PROCESS   | Fungal-type cell wall organization or biogenesis  |             |           |    |        |        |        |         |         |        |        |        |           |                      |           |           |       |            |          |     |           |                  |         |          |  |        |  |  |  |  |
|           | Fungal-type cell wall organization                |             |           |    |        |        |        |         |         |        |        |        |           |                      |           |           |       |            |          |     |           |                  |         |          |  |        |  |  |  |  |
|           | External encapsulating structure organization     |             |           |    |        |        |        |         |         |        |        |        |           |                      |           |           |       |            |          |     |           |                  |         |          |  |        |  |  |  |  |
|           | Cell wall organization                            |             |           |    |        |        |        |         |         |        |        |        |           |                      |           |           |       |            |          |     |           |                  |         |          |  |        |  |  |  |  |
|           | Cell wall organization or biogenesis              |             |           |    |        |        |        |         |         |        |        |        |           |                      |           |           |       |            |          |     |           |                  |         |          |  |        |  |  |  |  |
|           | Carbohydrate transmembrane transport              |             |           |    |        |        |        |         |         |        |        |        |           |                      |           |           |       |            |          |     |           |                  |         |          |  |        |  |  |  |  |
|           | Carbohydrate transport                            |             |           |    |        |        |        |         |         |        |        |        |           |                      |           |           |       |            |          |     |           |                  |         |          |  |        |  |  |  |  |
|           | Glucose transport                                 |             |           |    |        |        |        |         |         |        |        |        |           |                      |           |           |       |            |          |     |           |                  |         |          |  |        |  |  |  |  |
|           | Fructose transport                                |             |           |    |        |        |        |         |         |        |        |        |           |                      |           |           |       |            |          |     |           |                  |         |          |  |        |  |  |  |  |
|           | Mannose transport                                 |             |           |    |        |        |        |         |         |        |        |        |           |                      |           |           |       |            |          |     |           |                  |         |          |  |        |  |  |  |  |
|           | Monosaccharide transport                          |             |           |    |        |        |        |         |         |        |        |        |           |                      |           |           |       |            |          |     |           |                  |         |          |  |        |  |  |  |  |
|           | Monosaccharide transmembrane transport            |             |           |    |        |        |        |         |         |        |        |        |           |                      |           |           |       |            |          |     |           |                  |         |          |  |        |  |  |  |  |
|           | Glucose transmembrane transport                   |             |           |    |        |        |        |         |         |        |        |        |           |                      |           |           |       |            |          |     |           |                  |         |          |  |        |  |  |  |  |
|           | Hexose transmembrane transport                    |             |           |    |        |        |        |         |         |        |        |        |           |                      |           |           |       |            |          |     |           |                  |         |          |  |        |  |  |  |  |
|           | Hexose transport                                  |             |           |    |        |        |        |         |         |        |        |        |           |                      |           |           |       |            |          |     |           |                  |         |          |  |        |  |  |  |  |
| FUNCTION  | Glucose transmembrane transporter activity        |             |           |    |        |        |        |         |         |        |        |        |           |                      |           |           |       |            |          |     |           |                  |         |          |  |        |  |  |  |  |
|           | Monosaccharide transmembrane transporter activity |             |           |    |        |        |        |         |         |        |        |        |           |                      |           |           |       |            |          |     |           |                  |         |          |  |        |  |  |  |  |
|           | Hexose transmembrane transporter activity         |             |           |    |        |        |        |         |         |        |        |        |           |                      |           |           |       |            |          |     |           |                  |         |          |  |        |  |  |  |  |
|           | Carbohydrate transmembrane transporter activity   |             |           |    |        |        |        |         |         |        |        |        |           |                      |           |           |       |            |          |     |           |                  |         |          |  |        |  |  |  |  |
|           | Mannose transmembrane transporter activity        |             |           |    |        |        |        |         |         |        |        |        |           |                      |           |           |       |            |          |     |           |                  |         |          |  |        |  |  |  |  |
|           | Fructose transmembrane transporter activity       |             |           |    |        |        |        |         |         |        |        |        |           |                      |           |           |       |            |          |     |           |                  |         |          |  |        |  |  |  |  |
|           | Glucose transmembrane transporter activity        |             |           |    |        |        |        |         |         |        |        |        |           |                      |           |           |       |            |          |     |           |                  |         |          |  |        |  |  |  |  |
|           | Sugar transmembrane transporter activity          |             |           |    |        |        |        |         |         |        |        |        |           |                      |           |           |       |            |          |     |           |                  |         |          |  |        |  |  |  |  |
|           | Symporter activity                                |             |           |    |        |        |        |         |         |        |        |        |           |                      |           |           |       |            |          |     |           |                  |         |          |  |        |  |  |  |  |
|           | Solute proton symporter activity                  |             |           |    |        |        |        |         |         |        |        |        |           |                      |           |           |       |            |          |     |           |                  |         |          |  |        |  |  |  |  |
|           | Solute cation symporter activity                  |             |           |    |        |        |        |         |         |        |        |        |           |                      |           |           |       |            |          |     |           |                  |         |          |  |        |  |  |  |  |
|           | Sugar proton symporter activity                   |             |           |    |        |        |        |         |         |        |        |        |           |                      |           |           |       |            |          |     |           |                  |         |          |  |        |  |  |  |  |
|           | Cation sugar symporter activity                   |             |           |    |        |        |        |         |         |        |        |        |           |                      |           |           |       |            |          |     |           |                  |         |          |  |        |  |  |  |  |
|           | Structural constituent of cell wall               |             |           |    |        |        |        |         |         |        |        |        |           |                      |           |           |       |            |          |     |           |                  |         |          |  |        |  |  |  |  |
|           | Transporter activity                              |             |           |    |        |        |        |         |         |        |        |        |           |                      |           |           |       |            |          |     |           |                  |         |          |  |        |  |  |  |  |
|           | Transmembrane transporter activity                |             |           |    |        |        |        |         |         |        |        |        |           |                      |           |           |       |            |          |     |           |                  |         |          |  |        |  |  |  |  |
| COMPONENT | External encapsulating structure                  |             |           |    |        |        |        |         |         |        |        |        |           |                      |           |           |       |            |          |     |           |                  |         |          |  |        |  |  |  |  |
|           | Cell wall                                         |             |           |    |        |        |        |         |         |        |        |        |           |                      |           |           |       |            |          |     |           |                  |         |          |  |        |  |  |  |  |
|           | Fungal-type cell wall                             |             |           |    |        |        |        |         |         |        |        |        |           |                      |           |           |       |            |          |     |           |                  |         |          |  |        |  |  |  |  |
|           | Cell periphery                                    |             |           |    |        |        |        |         |         |        |        |        |           |                      |           |           |       |            |          |     |           |                  |         |          |  |        |  |  |  |  |
|           | Plasma membrane                                   |             |           |    |        |        |        |         |         |        |        |        |           |                      |           |           |       |            |          |     |           |                  |         |          |  |        |  |  |  |  |
|           | Plasma membrane part                              |             |           |    |        |        |        |         |         |        |        |        |           |                      |           |           |       |            |          |     |           |                  |         |          |  |        |  |  |  |  |
|           | Membrane part                                     |             |           |    |        |        |        |         |         |        |        |        |           |                      |           |           |       |            |          |     |           |                  |         |          |  |        |  |  |  |  |
|           | Cell part                                         |             |           |    |        |        |        |         |         |        |        |        |           |                      |           |           |       |            |          |     |           |                  |         |          |  |        |  |  |  |  |
|           | Cell                                              |             |           |    |        |        |        |         |         |        |        |        |           |                      |           |           |       |            |          |     |           |                  |         |          |  |        |  |  |  |  |
|           | Integral component of plasma membrane             |             |           |    |        |        |        |         |         |        |        |        |           |                      |           |           |       |            |          |     |           |                  |         |          |  |        |  |  |  |  |
|           | Intrinsic component of plasma membrane            |             |           |    |        |        |        |         |         |        |        |        |           |                      |           |           |       |            |          |     |           |                  |         |          |  |        |  |  |  |  |
|           | Intrinsic component of membrane                   |             |           |    |        |        |        |         |         |        |        |        |           |                      |           |           |       |            |          |     |           |                  |         |          |  |        |  |  |  |  |
|           | Anchored component of membrane                    |             |           |    |        |        |        |         |         |        |        |        |           |                      |           |           |       |            |          |     |           |                  |         |          |  |        |  |  |  |  |
|           | Extracellular region                              |             |           |    |        |        |        |         |         |        |        |        |           |                      |           |           |       |            |          |     |           |                  |         |          |  |        |  |  |  |  |
|           | Membrane                                          |             |           |    |        |        |        |         |         |        |        |        |           |                      |           |           |       |            |          |     |           |                  |         |          |  |        |  |  |  |  |

Number of Genes Analysed

251 254 314 288 246 237 249 275 193 216 282 227 241 271 259 269 269 270 236 268 250 259 244 103
