# Supplementary material for: A Quasi-Domesticate Relic Hybrid Population of Saccharomyces cerevisiae × S. paradoxus Adapted to Olive Brine
Source: PubMed Central journal article supplement (PMC6548830; doi:10.3389/fgene.2019.00449), 2019-05-29
Supplement: Table_3.pdf [file Table_3.pdf]

**SUPPLEMENTARY TABLE S3.** Cfu/ml counts per strain and per replicate for the growth and survival in olive brine experiment shown in Figure 2.

| Strain      | Replicate | Days              |                    |                    |                   |                   |                   |                   |                   |                   |
|-------------|-----------|-------------------|--------------------|--------------------|-------------------|-------------------|-------------------|-------------------|-------------------|-------------------|
|             |           | 0                 | 8                  | 15                 | 24                | 34                | 41                | 49                | 57                | 70                |
| YO 654      | 1         | $9.8 \times 10^4$ | $3.1 \times 10^5$  | $4.1 \times 10^5$  | $3.2 \times 10^5$ | $3.3 \times 10^5$ | $3.0 \times 10^5$ | $3.5 \times 10^5$ | $1.9 \times 10^6$ | $3.2 \times 10^6$ |
|             | 2         | $9.6 \times 10^4$ | $3.1 \times 10^5$  | $3.9 \times 10^5$  | $3.9 \times 10^5$ | $3.4 \times 10^5$ | $2.5 \times 10^5$ | $3.2 \times 10^5$ | $2.8 \times 10^6$ | $3.7 \times 10^6$ |
| ZIM 2580    | 1         | $9.8 \times 10^4$ | $4.2 \times 10^5$  | $2.1 \times 10^5$  | $1.3 \times 10^5$ | $8.1 \times 10^4$ | $6.7 \times 10^4$ | $5.6 \times 10^4$ | $9.6 \times 10^4$ | $7.5 \times 10^4$ |
|             | 2         | $7.5 \times 10^4$ | $1.8 \times 10^5$  | $1.96 \times 10^5$ | $1.5 \times 10^5$ | $7.3 \times 10^4$ | $1.3 \times 10^5$ | $8.2 \times 10^4$ | $8.0 \times 10^4$ | $7.1 \times 10^4$ |
| AP 7.2      | 1         | $1.1 \times 10^5$ | $8.1 \times 10^5$  | $5.0 \times 10^5$  | $3.9 \times 10^5$ | $2.8 \times 10^5$ | $6.4 \times 10^5$ | $4.2 \times 10^5$ | $5.0 \times 10^5$ | $3.9 \times 10^5$ |
|             | 2         | $1.1 \times 10^5$ | $3.5 \times 10^5$  | $3.4 \times 10^5$  | $5.3 \times 10^5$ | $5.2 \times 10^5$ | $3.8 \times 10^5$ | $4.2 \times 10^5$ | $4.9 \times 10^5$ | $3.7 \times 10^5$ |
| PYCC 4891   | 1         | $1.2 \times 10^5$ | $2.0 \times 10^5$  | $2.0 \times 10^5$  | $1.8 \times 10^5$ | $3.9 \times 10^5$ | $2.2 \times 10^5$ | $2.6 \times 10^5$ | $3.7 \times 10^5$ | $3.1 \times 10^5$ |
|             | 2         | $1.4 \times 10^5$ | $2.5 \times 10^5$  | $3.0 \times 10^5$  | $1.5 \times 10^5$ | $3.0 \times 10^5$ | $3.3 \times 10^5$ | $1.4 \times 10^5$ | $2.5 \times 10^5$ | $2.6 \times 10^5$ |
| AP 5.4      | 1         | $1.2 \times 10^5$ | $3.4 \times 10^5$  | $3.5 \times 10^5$  | $3.5 \times 10^5$ | $3.4 \times 10^5$ | $2.1 \times 10^5$ | $1.8 \times 10^5$ | $1.7 \times 10^5$ | $1.5 \times 10^5$ |
|             | 2         | $1.2 \times 10^5$ | $4.4 \times 10^5$  | $4.5 \times 10^5$  | $4.1 \times 10^5$ | $4.4 \times 10^5$ | $2.1 \times 10^5$ | $1.9 \times 10^5$ | $2.8 \times 10^5$ | $2.0 \times 10^5$ |
| PYCC 6732   | 1         | $1.0 \times 10^5$ | $2.5 \times 10^5$  | $2.3 \times 10^5$  | $3.6 \times 10^5$ | $4.9 \times 10^5$ | $2.9 \times 10^5$ | $1.6 \times 10^5$ | $2.1 \times 10^5$ | $2.3 \times 10^5$ |
|             | 2         | $1.2 \times 10^5$ | $2.2 \times 10^5$  | $2.4 \times 10^5$  | $2.4 \times 10^5$ | $2.3 \times 10^5$ | $3.6 \times 10^5$ | $1.9 \times 10^5$ | $2.6 \times 10^5$ | $2.9 \times 10^5$ |
| Lalvin W15  | 1         | $1.2 \times 10^5$ | $1.0 \times 10^5$  | $9.6 \times 10^4$  | $4.1 \times 10^4$ | $9.1 \times 10^4$ | $9.1 \times 10^4$ | $6.4 \times 10^4$ | $7.6 \times 10^4$ | $5.5 \times 10^4$ |
|             | 2         | $1.9 \times 10^5$ | $9.1 \times 10^4$  | $1.3 \times 10^5$  | $4.5 \times 10^4$ | $1.8 \times 10^5$ | $1.6 \times 10^5$ | $2.3 \times 10^5$ | $3.4 \times 10^5$ | $1.3 \times 10^5$ |
| AWRI 1631   | 1         | $9.7 \times 10^4$ | $3.87 \times 10^5$ | $2.2 \times 10^5$  | $2.9 \times 10^4$ | $1.2 \times 10^4$ | $1.6 \times 10^4$ | $2.2 \times 10^4$ | $1.8 \times 10^4$ | $1.3 \times 10^4$ |
|             | 2         | $1.9 \times 10^5$ | $6.5 \times 10^5$  | $2.0 \times 10^5$  | $2.8 \times 10^4$ | $1.8 \times 10^4$ | $2.2 \times 10^4$ | $1.3 \times 10^4$ | $1.6 \times 10^4$ | $9.6 \times 10^3$ |
| PR          | 1         | $1.0 \times 10^5$ | $4.8 \times 10^5$  | $2.4 \times 10^5$  | $1.2 \times 10^5$ | $2.6 \times 10^5$ | $2.4 \times 10^5$ | $1.4 \times 10^5$ | $1.5 \times 10^5$ | $1.8 \times 10^5$ |
|             | 2         | $1.4 \times 10^5$ | $1.5 \times 10^5$  | $2.2 \times 10^5$  | $1.9 \times 10^5$ | $1.8 \times 10^5$ | n.d.              | n.d.              | n.d.              | n.d.              |
| Uvaferm VRB | 1         | $9.6 \times 10^4$ | $2.5 \times 10^5$  | $1.5 \times 10^5$  | $6.0 \times 10^4$ | $2.6 \times 10^4$ | $3.9 \times 10^4$ | $2.9 \times 10^4$ | $6.7 \times 10^4$ | $3.7 \times 10^4$ |
|             | 2         | $1.0 \times 10^5$ | $2.3 \times 10^5$  | $2.2 \times 10^5$  | $2.5 \times 10^4$ | $2.9 \times 10^4$ | $2.5 \times 10^4$ | $1.2 \times 10^4$ | $3.3 \times 10^4$ | $1.3 \times 10^4$ |
| PYCC 4072   | 1         | $1.2 \times 10^5$ | $1.5 \times 10^5$  | $9.3 \times 10^4$  | $3.5 \times 10^4$ | $2.9 \times 10^4$ | $6.4 \times 10^4$ | $2.4 \times 10^4$ | $4.4 \times 10^4$ | $9.4 \times 10^4$ |
|             | 2         | $1.8 \times 10^5$ | $2.6 \times 10^5$  | $1.0 \times 10^5$  | $5.5 \times 10^4$ | $5.5 \times 10^4$ | $7.1 \times 10^4$ | $4.7 \times 10^4$ | $9.0 \times 10^4$ | $3.9 \times 10^4$ |
| TUM V1      | 1         | $2.1 \times 10^5$ | $2.8 \times 10^5$  | $4.6 \times 10^4$  | $5.2 \times 10^4$ | $2.6 \times 10^4$ | $1.7 \times 10^4$ | $2.3 \times 10^4$ | $2.1 \times 10^4$ | $4.5 \times 10^4$ |
|             | 2         | $1.4 \times 10^5$ | $2.0 \times 10^5$  | $9.7 \times 10^4$  | $1.0 \times 10^4$ | $1.6 \times 10^4$ | $1.4 \times 10^4$ | $6.9 \times 10^4$ | $5.4 \times 10^4$ | $1.5 \times 10^4$ |
